# Supplementary material
Source: PubMed Central journal article supplement (PMC4104859)
Supplement: 1409928111_pnas.201409928SI.pdf [file 1409928111_pnas.201409928SI.pdf]

# Supporting Information

Srinivasan et al. 10.1073/pnas.1409928111

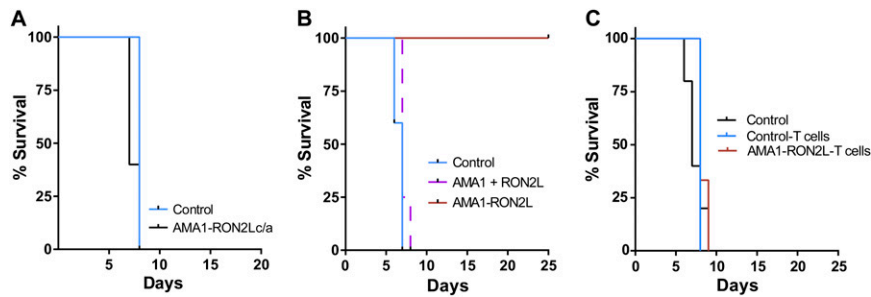

**Fig. S1.** (A) Kaplan–Meier curve of the overall survival of animals in Fig. 1F. (B) Kaplan–Meier curve of the overall survival of animals in Fig. 1G. (C) T-cell transfer does not protect against *PyYM* challenge. Kaplan–Meier curve of the overall survival of animals after passive transfer of  $2 \times 10^6$  T cells from mice immunized with PBS-adjuvant (blue) or mice immunized with *PyAMA1*-RON2L complex (red) on days  $-1$ ,  $0$ , and  $+1$ . Mice that received no cells were used as infection controls (black). Five mice per group were used and were challenged with  $10^5$  *PyYM* parasites i.v. on day 0.

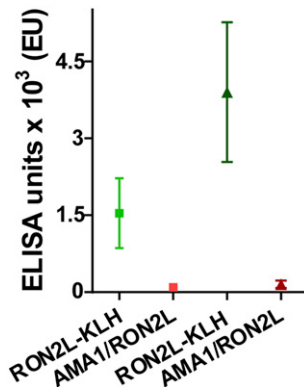

**Fig. S2.** Anti-PfRON2L antibody titers induced by *Pf*RON2L-KLH and *Pf*AMA1-RON2L complex in rats. ELISA units represent the RON2L-specific antibody titer in either purified IgG (2 mg/mL) or serum from four immunized rats used in Fig. 2A. Error bars indicate mean  $\pm$  SEM.

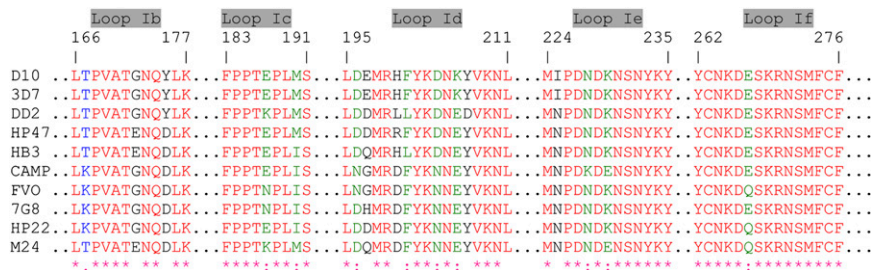

**Fig. S3.** Sequence alignment showing polymorphisms in the individual domain I loops surrounding the hydrophobic groove across multiple *Plasmodium falciparum* parasite strains.

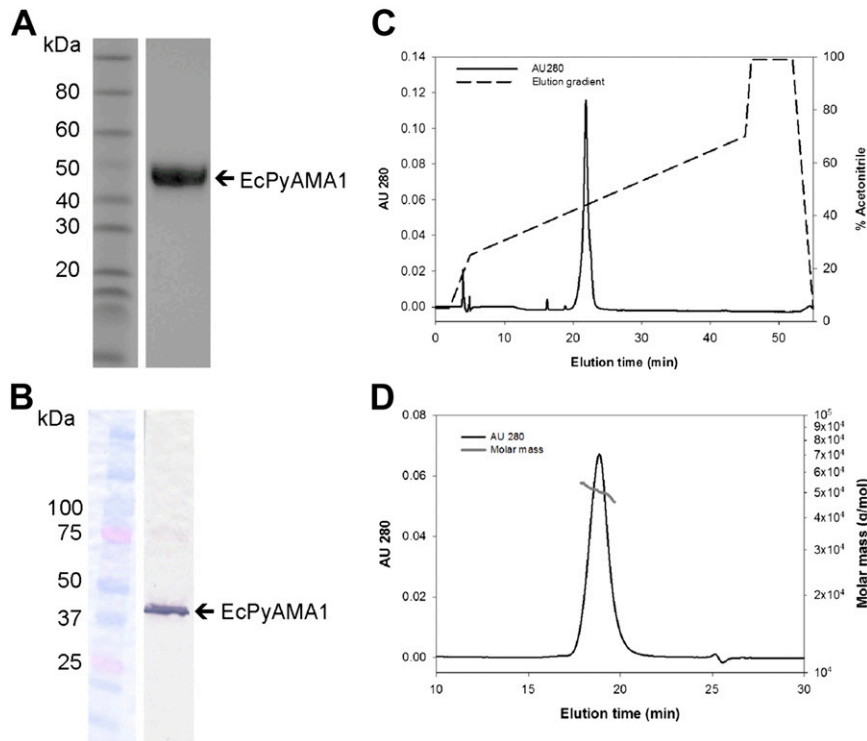

**Fig. 54.** Biochemical and biophysical characterization of recombinant EcPyAMA1. (A and B) Analysis of purified recombinant EcPyAMA1 by Coomassie blue-stained SDS/PAGE gel (A) and Western blot with a PyAMA1-specific mAb 45B1 under nonreduced conditions (B). Molecular mass markers are shown alongside. (C) Reversed-phase HPLC analysis showing a single peak along with the acetonitrile gradient elution. (D) Analytical size-exclusion chromatography showing a single monomeric peak.

PyRON2L: KLH-cDITQHATDIGMGPSTSCYTSLLPPPKSICIQQQTVKTVLTNSTLASMK-NH2  
 PyRON2L: Biotin-Ahx-DITQHATDIGMGPSTSCYTSLLPPPKSICIQQQTVKTVLTNSTLASMK-NH2  
 Pf3D7RON2L: KLH-cDITQQAKDIGAGPVASCFTTRMSPPQQICLNSVVNTALSTSTQSAMK-NH2  
 Pf3D7RON2L: Biotin-Ahx-DITQQAKDIGAGPVASCFTTRMSPPQQICLNSVVNTALSTSTQSAMK-NH2  
 Pf3D7\_DIa: Biotin-Ahx-LGEDAEVAGTQYRLPS-NH2  
 Pf3D7\_DIb: Biotin-Ahx-ENSNTTFLTPVATGNQYLKDGGA-NH2  
 Pf3D7\_DId: Biotin-Ahx-TLDEMRFYKDNKYVK-NH2  
 Pf3D7\_DIe: Biotin-Ahx-GNMIPDNDKNSYK-NH2  
 Pf3D7\_DIf: Biotin-Ahx-RYCNKDESKRNSMFCFR-NH2  
 Pf3D7\_DII: Biotin-Ahx-SDQPKQYEQHLTDYEKIKEGFKKNASMIKSAFLPTGAFKADRYKSH-NH2  
 Pf3D7\_DId+e: Biotin-Ahx-SPMTLDEMRFYKDNKYVKNLDELTLCSRHAGNMIPDNDKNSYKYPVYDDKDKKCH-NH2  
 Pf3D7\_DIb+c+d: Biotin-Ahx-SNTTFLTPVATGNQYLKDGGAFFPTEPLMSPTLDEMRFYKDNKYVKNL-NH2

**Fig. 55.** Peptide sequences corresponding to PyRON2L, Pf RON2L, and PfAMA1 domain I and domain II loop regions used in this study. Disulfide bridged cysteine residues in the peptides are underlined. All peptides were amidated (NH2) at the C terminus.
